# Supplementary material for: GP and parent dissonance about the assessment and treatment of childhood eczema in primary care: a qualitative study
Source: BMJ Open. 2018 Feb 15;8(2):e019633. doi: 10.1136/bmjopen-2017-019633 (PMC5829900; doi:10.1136/bmjopen-2017-019633)
Supplement: Supplementary Appendix 1 [file bmjopen-2017-019633supp001.pdf]

## Appendix A: Coding framework

| Codes and sub-codes |                                                                                                                                                                                                                                                                                                                                                                                                                                                                                                                                                                                                                                                                                                                                                                                                                 |
|---------------------|-----------------------------------------------------------------------------------------------------------------------------------------------------------------------------------------------------------------------------------------------------------------------------------------------------------------------------------------------------------------------------------------------------------------------------------------------------------------------------------------------------------------------------------------------------------------------------------------------------------------------------------------------------------------------------------------------------------------------------------------------------------------------------------------------------------------|
| 1                   | <b>Practice demographics</b>                                                                                                                                                                                                                                                                                                                                                                                                                                                                                                                                                                                                                                                                                                                                                                                    |
| 2                   | <b>Family set up</b> – Number of family members in household, number of family members with eczema, carers of children i.e. nursery, grandparents etc.                                                                                                                                                                                                                                                                                                                                                                                                                                                                                                                                                                                                                                                          |
| 3                   | <b>How eczema started and was diagnosed</b>                                                                                                                                                                                                                                                                                                                                                                                                                                                                                                                                                                                                                                                                                                                                                                     |
| 5                   | <b>Healthcare professional (HCP)/stakeholder biography</b> - years in practice/specialist interest                                                                                                                                                                                                                                                                                                                                                                                                                                                                                                                                                                                                                                                                                                              |
| 6                   | <b>HCP knowledge about eczema</b><br>Sub-codes: <ul style="list-style-type: none"> <li>- Frequency of seeing children with eczema</li> <li>- How parents perceive HCPs knowledge</li> <li>- HCP dermatology training</li> <li>- HCP confidence/knowledge around diagnosis</li> <li>- HCP confidence/knowledge around treatment</li> <li>- Resources used by HCPs (GPSI/books/guidelines/websites)</li> </ul>                                                                                                                                                                                                                                                                                                                                                                                                    |
| 7                   | <b>Eczema consultations</b><br>Sub-codes: <ul style="list-style-type: none"> <li>- Support/advice given (including written info and signposting)</li> <li>- Follow up arrangements</li> <li>- Lack of HCP time (to give support/advice/education)</li> <li>- Recurrent visits to HCP</li> <li>- Patient confidence in HCPs</li> <li>- History taking (this refers to the questions about the condition that GPs ask their patients during an eczema consultation)</li> <li>- HCP attitude</li> </ul>                                                                                                                                                                                                                                                                                                            |
| 8                   | <b>Medications</b><br>Sub-codes: <ul style="list-style-type: none"> <li>- Medications prescribed (what meds are prescribed/repeat prescriptions)</li> <li>- Assessing patient compliance with meds</li> <li>- Parent requests for particular treatments</li> <li>- Quantities of treatments prescribed</li> <li>- Trial and error (this refers to where different emollients are trialled to identify patient preference for a particular type of emollient – e.g. gel, lotion, cream, ointment)</li> <li>- HCP views about medicated ointments (i.e. topical corticosteroids)</li> <li>- Parent views about medicated ointments</li> <li>- Appropriate use of meds/compliance</li> <li>- Prescribing restrictions</li> <li>- Adverse reactions to meds</li> <li>- Parent acceptability of treatment</li> </ul> |
| 9                   | <b>Complementary therapies</b> - complementary therapies used by parents/parent desire to use natural products                                                                                                                                                                                                                                                                                                                                                                                                                                                                                                                                                                                                                                                                                                  |
| 10                  | <b>Referrals</b><br>Sub-codes: <ul style="list-style-type: none"> <li>- Referral pathways</li> <li>- Reasons for referral</li> <li>- HCP pressure to refer/parent desire for referral</li> </ul>                                                                                                                                                                                                                                                                                                                                                                                                                                                                                                                                                                                                                |
| 11                  | <b>Eczema symptoms</b><br>Sub-codes: <ul style="list-style-type: none"> <li>- Recognising flares/infection</li> <li>- Symptoms (e.g. difficulty stopping the child scratching)</li> </ul>                                                                                                                                                                                                                                                                                                                                                                                                                                                                                                                                                                                                                       |

|    |                                                                                                                                                                                                                                                                                                                                                                                                                                                                         |
|----|-------------------------------------------------------------------------------------------------------------------------------------------------------------------------------------------------------------------------------------------------------------------------------------------------------------------------------------------------------------------------------------------------------------------------------------------------------------------------|
|    | <ul style="list-style-type: none"> <li>- Different types of skin</li> <li>- Triggers</li> <li>- Impact of eczema</li> </ul>                                                                                                                                                                                                                                                                                                                                             |
| 12 | <b>Allergy/diet</b> - parent questions/beliefs about allergy and diet, and management of these by the HCP                                                                                                                                                                                                                                                                                                                                                               |
| 13 | <b>Parent knowledge about eczema</b><br>Sub-codes: <ul style="list-style-type: none"> <li>- Parent knowledge</li> <li>- Sources of knowledge (HCPs/internet/friends and family) (includes advice about treatments)</li> <li>- Prior experience of eczema (e.g. parent or other sibling had it)</li> <li>- HCP view of parental knowledge</li> <li>- Support/advice desired by parents</li> </ul>                                                                        |
| 14 | <b>Parent beliefs about eczema</b>                                                                                                                                                                                                                                                                                                                                                                                                                                      |
| 15 | <b>Parent guilt</b> – guilt about asking for more prescriptions/wasting doctors time                                                                                                                                                                                                                                                                                                                                                                                    |
| 16 | <b>Financial burden of eczema for patients</b>                                                                                                                                                                                                                                                                                                                                                                                                                          |
| 17 | <b>Problems parents face when managing the condition</b><br>Sub-codes: <ul style="list-style-type: none"> <li>- Stress/emotions/mental health</li> <li>- Conflicting advice/information</li> <li>- Confusion</li> <li>- Overload of information</li> <li>- Need for better education</li> <li>- Lack of support from HCPs (incl lack of continuity of care)</li> <li>- Recall of information</li> <li>- Access to HCP appointments</li> <li>- Medical jargon</li> </ul> |
| 18 | <b>Past experience of WAPs (Written Action Plans)</b>                                                                                                                                                                                                                                                                                                                                                                                                                   |
| 19 | <b>Value of WAPs</b><br>Sub-codes: <ul style="list-style-type: none"> <li>- Benefits</li> <li>- Which patients they are useful for</li> <li>- Dis-benefits</li> <li>- Timing of WAP</li> </ul>                                                                                                                                                                                                                                                                          |
| 20 | <b>WAP content</b><br>Sub-codes: <ul style="list-style-type: none"> <li>- Specific patient-related content (what medication, how much, and allergies and other conditions that child has)</li> <li>- General content (how to apply meds, signposting, hints and tips, bathing, what eczema is etc)</li> <li>- Other content (photo/consent to share/when to seek help etc./log of treatments used)</li> </ul>                                                           |
| 21 | <b>WAP format</b><br>Sub-codes: <ul style="list-style-type: none"> <li>- Colour vs black and white</li> <li>- Length (incl displaying on fridge)</li> <li>- Paper vs electronic</li> <li>- Pictures vs text</li> <li>- Child friendly</li> </ul>                                                                                                                                                                                                                        |
| 22 | <b>Completing the WAP</b> <ul style="list-style-type: none"> <li>- Ease of use</li> <li>- Who should be completing it</li> </ul>                                                                                                                                                                                                                                                                                                                                        |

|    |                                                                                                                                                   |
|----|---------------------------------------------------------------------------------------------------------------------------------------------------|
| 23 | <b>Sharing the WAP</b><br>Sub-codes:<br>- Who to share it with<br>- How to share it                                                               |
| 24 | <b>Updating WAP</b>                                                                                                                               |
| 25 | <b>Critique of sample WAPs</b>                                                                                                                    |
| 26 | <b>Challenges of WAPs in primary care</b> - includes language barriers/lack of GP time to complete WAP/IT considerations/HCP familiarity with WAP |
| 27 | <b>Patient vs HCP perspective of eczema</b> – differences between parental and HCP views of eczema                                                |
| 28 | <b>Managing dissonance between patient and GP views</b> – ways in which GPs attempted to manage areas of dissonance with parents.                 |
| 29 | <b>Resources/training need to support WAP use</b>                                                                                                 |
| 30 | <b>Other resources to support eczema care</b>                                                                                                     |
